# Supplementary material for: Growth of for‐profit involvement in emergency medicine graduate medical education and association between for‐profit affiliation and resident salary
Source: PubMed Central journal article supplement (PMC9348842; doi:10.1002/aet2.10786), 2022-08-03

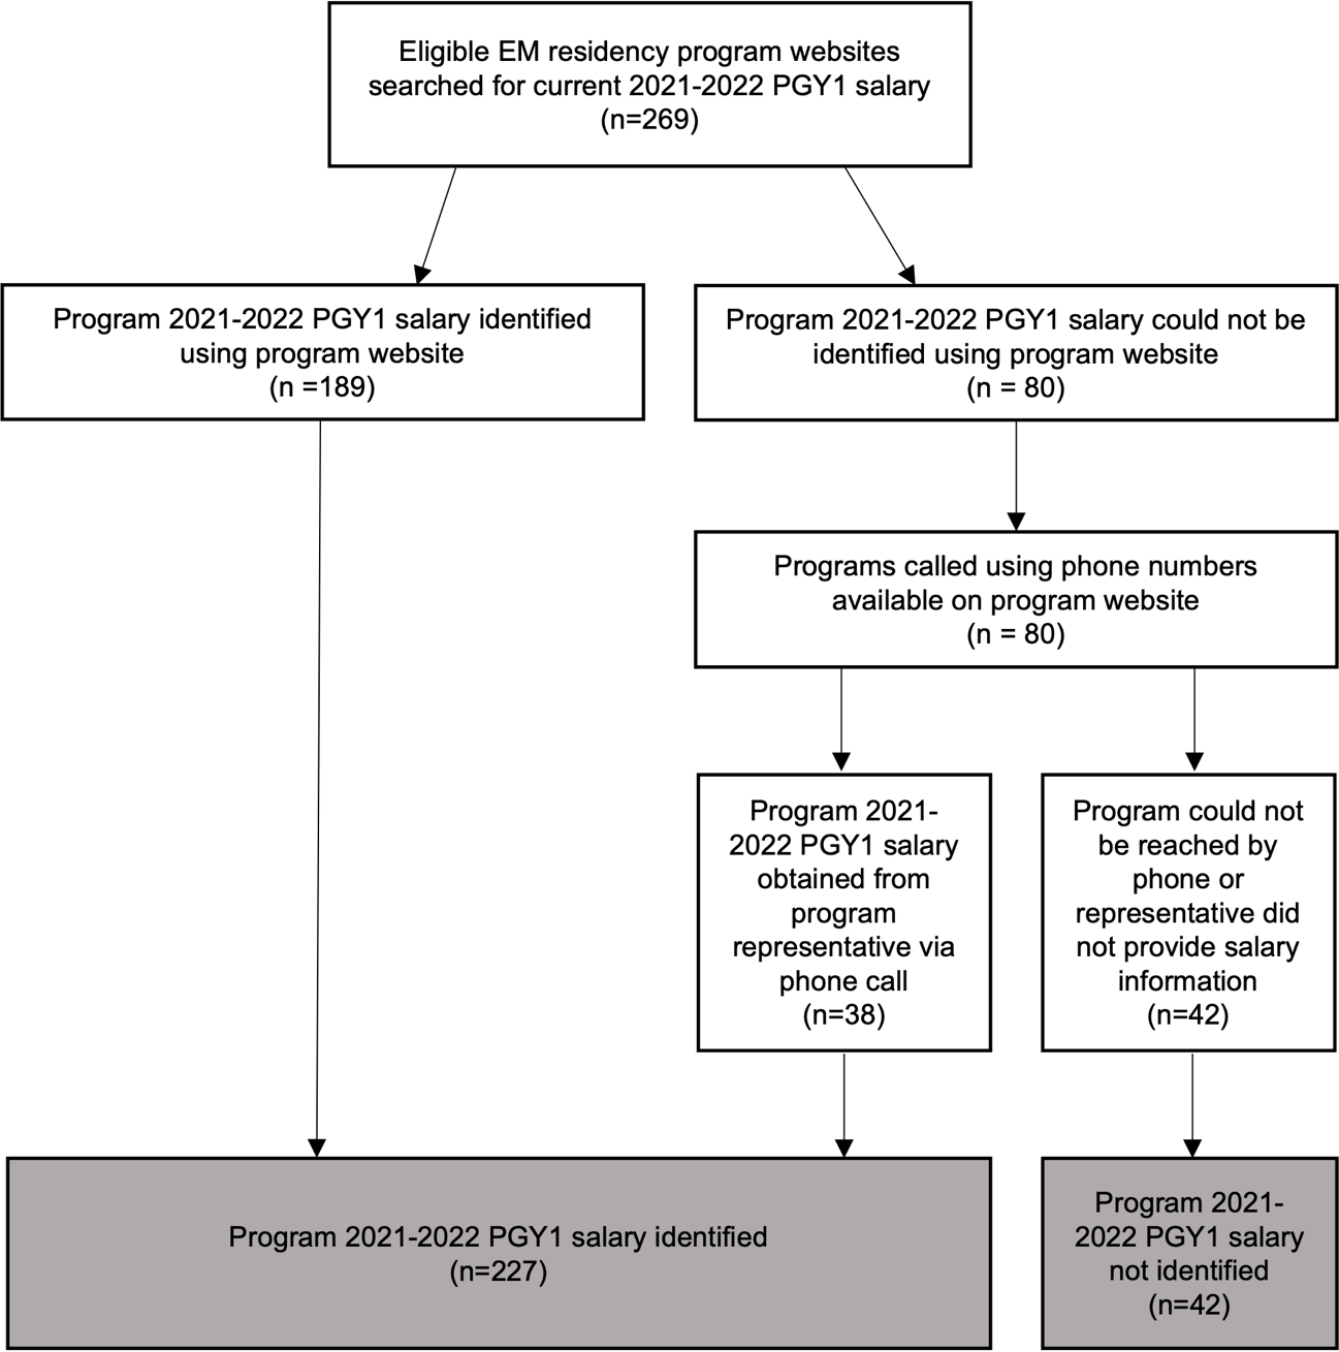

Supplement: AET2-6-e10786-s003.pdf [file AET2-6-e10786-s003.pdf]
